# Supplementary material for: Nutrient Starvation Exposure Induced the Down-Regulation of Stress Responsive Genes and Selected Bioactive Metabolic Pathways in Phaeodactylum tricornutum
Source: MDPI journal article supplement (doi:10.3390/stresses2030022), 2022-08-15
Supplement: s1 [file s1]

**Supplementary Table S1.** Primer abbreviation, GenBank accession numbers, full names, sequences, amplicon sizes and oligo efficiencies (E) are provided for the genes of interest in *P. tricornutum*.

| GENES   | GenBank Acc. N. | Gene Name on GenBank                                    | Primer Forward              | Primer Reverse           | Amplicon Size | Efficiency |
|---------|-----------------|---------------------------------------------------------|-----------------------------|--------------------------|---------------|------------|
| HSP40A  | XM_002177988.1  | chaperone, dnaj-like protein (HSP40A)                   | AGAAATGCGGATGAA<br>AGTGC    | GAAGTTTTTGGTCGCTT<br>GCT | 102 NT        | 2          |
| HSP40C  | XM_002179448.1  | chaperone, dnaj-like protein (HSP40C)                   | CCAATAATTACCGCGC<br>TTGT    | GTTGCTCGTCCTCGTTT<br>AGC | 187 NT        | 2          |
| HSP70_1 | XM_002177261.1  | predicted protein (Hsp70_1)                             | TCCCTACCCTTCATCA<br>CAGC    | ATTCGCGTCATACCTC<br>CAAC | 194 NT        | 2          |
| HSP70A  | XM_002177315.1  | chaperone, dnaj-like protein (HSP40A)                   | TGCTATTGCGTATGGT<br>CTCG    | CGAAATCTTCTCCACC<br>CAAA | 161 NT        | 2          |
| MDR     | XM_002178678.1  | small multidrug resistance protein                      | CTGGCTCAGTTCCACC<br>AAAT    | GACTTCGATTTTTGCCA<br>AGC | 187NT         | 2          |
| CYP450  | XM_002178794.1  | cytochrome P450                                         | CTCTACGCCATGCATC<br>AAGA    | GAGGTAGGGACCCAA<br>GAAGG | 159NT         | 2          |
| GPX     | XM_002180703.1  | glutathione peroxidase                                  | TAGCGTTCGAGTCCTTTT<br>CGT   | AATTTTGTGCGGCCTCT<br>TCG | 189 NT        | 2          |
| GSH     | XM_002186446.1  | glutathione synthetase. GSH synthetase (gshB)           | ATTGCCCTGGATCGCT<br>TTGA    | CGACTTGCCCCAGTTTT<br>GTG | 196 NT        | 2          |
| GOX     | XM_002178555.1  | glycolate oxidase                                       | ATTTTTCGGTTGTCCGA<br>CTG    | TTGGGTCCGTTGAATA<br>GCTC | 156 NT        | 2          |
| APX     | XM_002180836.1  | l-ascorbate peroxidase                                  | TGCAGTACCAGGATCC<br>TTCC    | TCCCTTGGAGATCAAA<br>GCAG | 161NT         | 2          |
| SOD1    | XM_002180461.1  | precursor of mutase superoxide dismutase [Fe/Mn] (SOD1) | AGGTGCCCCATTCTTGA<br>TTTG   | TTGATGAGGTCGACAA<br>GCTG | 163 NT        | 2          |
| SOD2    | XM_002177217.1  | mutase superoxide dismutase (SOD2)                      | F:CACCGCATAGCTTCA<br>TCAGA  | AGTTGGCAGCTCATGC<br>TTCT | 224 NT        | 2          |
| TOC     | XM_002181879.1  | tocopherol cyclase (VTE1)                               | CTCAGTTCGCCAGTA<br>AAGC     | ATGCGGTACTTGTCCG<br>TTTC | 167 NT        | 2          |
| MAD1    | XM_002181572.1  | mitotic spindle assembly checkpoint protein (Pt-MAD1)   | TTTCGAAGGGTTGGTA<br>GTGG    | TTCAAGGGTACGGGAA<br>ACAG | 185NT         | 2          |
| MAD2    | XM_002181266.1  | mitotic checkpoint protein with homology with MAD2      | ACGAAAATGACCAGC<br>CAAAC    | CGAGCAAATCAAAAG<br>TGCAA | 156 NT        | 2          |
| HYS     | XM_002184494.1  | histone deacetylase 1 isoform                           | TGGCCTTTACAAGGAG<br>ATGG    | AAAGACGGGACAATC<br>AGTGG | 181 NT        | 2          |
| CASP    | XM_002182516.1  | metacaspase                                             | TGAAGATGCGGGGTAT<br>TCTC    | CGTCATTATGGCATCC<br>ACTG | 189NT         | 2          |
| SQD1    | XM_002185932.1  | UDP-sulfoquinovose synthase                             | TACGGAAGTACGGGTG<br>GAGA    | ACTTGGTGGCATGGTA<br>GACG | 118           | 2          |
| SQD2    | XM_002185240.1  | sulfoquino-<br>vosyldiacylglycerol<br>synthase          | AACTGACTCGCAACGGT<br>GATT   | TCCAGCATGGGCTTG<br>ATGT  | 194           | 2          |
| MGD1    | XM_002181649.1  | monogalactosyldiacylglycerol synthase                   | GGTACCACAGTGCAGTCTT<br>TCAA | CTTCTTGCCGGGGA<br>GATA   | 164           | 2          |
| MGD2    | XM_002186319.1  | monogalactosyldiacylglycerol synthase                   | ACCATCGGCAACTTCG<br>ACTT    | TTGAGCGCCCCTTGAT<br>TCTT | 165           | 2          |
| MGD3    | XM_002176764.1  | monogalactosyldiacylglycerol synthase                   | GAGTCCGCCGAGAGTT<br>GAAA    | TCATTACGACCGCAGA<br>CCAC | 166           | 2          |
